# Supplementary material for: Human NK cell development in hIL-7 and hIL-15 knockin NOD/SCID/IL2rgKO mice
Source: Life Sci Alliance. 2019 Apr 1;2(2):e201800195. doi: 10.26508/lsa.201800195 (PMC6445396; doi:10.26508/lsa.201800195)
Supplement: Supplementary file 1 [file LSA-2018-00195_TableS1.xlsx]

## Sheet: Sheet1
Strain	Number of recipient mice	BM			Spleen
		T cells	B cells	NK cells	T cells	B cells	NK cells
NSG	21	37.7±5.7%	35.4±3.8%	1.0±0.2%	48.1±4.8%	44.6±4.3%	0.7±0.1%
hIL-7 Tg	3	28.7±27.1%	42.0±18.9%	0.8±0.2%	38.5±23.5%	47.9±18.8%	0.7±0.3%
hIL-7 KI	4	11.4±5.9%	29.8±8.9%	1.2±0.5%	53.4±11.3%	30.9±8.0%	2.6±1.0%
Table S1. Summary of engrafted each lineage within CD45+cells in NSG mice and NSG mice expressing hIL-7
