# Supplementary material for: Human NK cell development in hIL-7 and hIL-15 knockin NOD/SCID/IL2rgKO mice
Source: Life Sci Alliance. 2019 Apr 1;2(2):e201800195. doi: 10.26508/lsa.201800195 (PMC6445396; doi:10.26508/lsa.201800195)
Supplement: Supplementary file 3 [file LSA-2018-00195_TableS3.xlsx]

## Sheet: Sheet1
mouse ID	CB ID	Strain	Weeka	BM			Spleen			Cytotoxic granules in hCD45+CD56+b
				In live cells	In hCD45+CD56+		In live cells	In hCD45+CD56+
				hCD45+ CD56+	CD94+	CD94+	hCD45+ CD56+	CD94+	CD94+	Granzyme B+	Perforin+	Granzyme B+ Perforin+
					CD16+	CD16-		CD16+	CD16-
IL7x15#1	CB#1	hIL-7xhIL-15 KI	15	2.4 x 105	1.7 x 105	4.8 x 104	1.1 x 106	8.1 x 105	1.5 x 105	NE	NE	NE
IL7x15#2	CB#1	hIL-7xhIL-15 KI	18	2.2 x 105	1.0 x 105	1.1 x 105	4.7 x 105	3.1 x 105	1.5 x 105	2.6 x 105	3.1 x 105	2.4 x 105
IL7x15#3	CB#2	hIL-7xhIL-15 KI	10	1.9 x 105	8.8 x 104	8.1 x 104	2.1 x 106	1.1 x 106	4.4 x 105	NE	NE	NE
IL7x15#4	CB#2	hIL-7xhIL-15 KI	16	4.2 x 105	1.8 x 105	1.8 x 105	1.1 x 106	6.3 x 105	2.9 x 105	4.5 x 105	5.0 x 105	3.4 x 105
IL7x15#5	CB#3	hIL-7xhIL-15 KI	13	1.9 x 105	1.6 x 105	2.9 x 104	7.0 x 105	5.8 x 105	9.5 x 104	NE	NE	NE
IL7x15#6	CB#4	hIL-7xhIL-15 KI	19	2.8 x 105	6.2 x 104	2.1 x 105	1.2 x 106	1.1 x 106	1.3 x 105	NE	NE	NE
IL7x15#7	CB#4	hIL-7xhIL-15 KI	22	8.6 x 104	3.1 x 104	4.6 x 104	3.9 x 105	3.7 x 105	1.2 x 104	2.2 x 105	3.0 x 105	2.1 x 105
IL7x15#8	CB#4	hIL-7xhIL-15 KI	23	1.3 x 105	3.7 x 104	7.7 x 104	7.6 x 105	6.5 x 105	6.9 x 104	NE	NE	NE
IL7x15#9	CB#5	hIL-7xhIL-15 KI	13	1.0 x 105	3.5 x 104	5.3 x 104	4.7 x 105	3.4 x 105	1.3 x 105	1.2 x 105	3.7 x 105	1.2 x 105
IL7x15#10	CB#6	hIL-7xhIL-15 KI	19	1.9 x 105	9.1 x 104	9.0 x 104	8.8 x 105	6.8 x 105	1.9 x 105	2.7 x 105	6.4 x 105	2.6 x 105
IL7x15#11	CB#7	hIL-7xhIL-15 KI	16	4.2 x 103	1.4 x 103	2.2 x 103	3.4 x 105	2.3 x 105	8.7 x 104	1.3 x 105	1.3 x 105	8.4 x 104
IL7x15#12	CB#7	hIL-7xhIL-15 KI	17	1.4 x 104	9.4 x 103	3.6 x 103	9.5 x 105	7.7 x 105	1.2 x 105	5.1 x 105	5.2 x 105	4.2 x 105
IL7x15#13	CB#8	hIL-7xhIL-15 KI	13	3.3 x 105	1.2 x 105	1.8 x 105	6.1 x 105	3.9 x 105	1.9 x 105	2.9 x 105	3.8 x 105	2.6 x 105
IL7x15#14	CB#9	hIL-7xhIL-15 KI	20	2.6 x 105	NE	NE	4.0 x 105	NE	NE	NE	NE	NE
IL7x15#15	CB#10	hIL-7xhIL-15 KI	11	2.5 x 105	5.9 x 104	1.7 x 105	1.3 x 106	6.9 x 105	5.4 x 105	NE	NE	NE
IL7x15#16	CB#11	hIL-7xhIL-15 KI	15	5.0 x 104	1.0 x 104	3.4 x 104	3.8 x 105	2.9 x 105	7.4 x 104	1.8 x 105	2.4 x 105	1.5 x 105
IL7x15#17	CB#12	hIL-7xhIL-15 KI	15	1.9 x 105	8.3 x 104	7.7 x 104	1.8 x 106	1.5 x 106	2.4 x 105	1.3 x 106	1.0 x 106	9.1 x 106
IL7x15#18	CB#13	hIL-7xhIL-15 KI	8	4.5 x 105	1.7 x 105	2.2 x 105	2.2 x 105	1.4 x 105	6.0 x 104	NE	NE	NE
IL7x15#19	CB#14	hIL-7xhIL-15 KI	16	5.7 x 104	9.9 x 103	4.5 x 104	4.6 x 105	3.7 x 105	8.2 x 104	NE	NE	NE
IL7x15#20	CB#15	hIL-7xhIL-15 KI	9	1.2 x 105	8.0 x 104	1.2 x 104	2.2 x 106	1.6 x 106	4.0 x 105	NE	NE	NE
IL7x15#21	CB#16	hIL-7xhIL-15 KI	11	1.0 x 105	3.6 x 104	5.6 x 104	9.3 x 105	6.9 x 105	1.2 x 105	NE	NE	NE
IL7x15#22	CB#17	hIL-7xhIL-15 KI	10	2.0 x 105	1.5 x 105	2.2 x 104	4.7 x 105	3.4 x 105	7.0 x 104	NE	NE	NE
IL7x15#23	CB#17	hIL-7xhIL-15 KI	11	1.7 x 105	1.1 x 105	3.5 x 104	4.5 x 105	2.9 x 105	1.0 x 105	NE	NE	NE
NSG#1	CB#1	NSG	20	8.1 x 103	NE	NE	3.2 x 104	8.6 x 103	2.0 x 104	3.2 x 102	1.6 x 103	2.5 x 102
NSG#2	CB#2	NSG	17	1.9 x 104	1.0 x 104	7.1 x 103	4.0 x 104	1.5 x 104	1.8 x 104	1.9 x 104	1.7 x 104	1.4 x 104
NSG#3	CB#2	NSG	18	4.7 x 104	7.8 x 103	1.6 x 104	1.7 x 105	4.0 x 104	9.7 x 104	1.6 x 104	3.0 x 104	1.1 x 104
NSG#4	CB#3	NSG	18	8.3 x 104	6.1 x 104	1.7 x 104	3.0 x 105	1.7 x 105	7.7 x 104	NE	NE	NE
NSG#5	CB#3	NSG	19	9.9 x 104	5.6 x 104	3.3 x 104	1.8 x 105	7.1 x 104	8.5 x 104	4.2 x 104	9.8 x 104	4.0 x 104
NSG#6	CB#3	NSG	20	7.5 x 104	4.1 x 104	2.3 x 104	1.7 x 105	4.0 x 104	1.1 x 105	4.5 x 103	1.7 x 104	3.3 x 103
NSG#7	CB#5	NSG	18	4.4 x 104	7.5 x 103	1.4 x 104	1.1 x 105	2.5 x 104	5.3 x 104	1.5 x 104	5.0 x 104	1.3 x 104
NSG#8	CB#5	NSG	19	2.4 x 104	3.0 x 103	4.3 x 103	2.5 x 104	2.9 x 103	1.7x 104	9.3 x 102	3.0 x 103	8.4 x 102
NSG#9	CB#7	NSG	17	4.4 x 103	1.3 x 103	2.8 x 103	2.6 x 104	6.0 x 103	1.9 x 104	NE	NE	NE
NSG#10	CB#8	NSG	19	2.1 x 104	3.8 x 103	7.5 x 103	5.7 x 105	9.5 x 104	3.6 x 105	1.0 x 105	4.8 x 104	3.2 x 104
NSG#11	CB#8	NSG	19	3.0 x 104	1.4 x 104	7.1 x 103	2.5 x 105	8.6 x 104	1.3 x 105	NE	NE	NE
NSG#12	CB#10	NSG	20	1.3 x 103	2.3 x 102	7.3 x 102	2.1 x 104	2.4 x 103	1.5 x 104	NE	NE	NE
NSG#13	CB#10	NSG	20	1.5 x 105	2.6 x 104	1.1 x 105	6.1 x 105	2.0 x 105	4.0 x 105	3.5 x 105	4.1 x 105	2.9 x 105
NSG#14	CB#12	NSG	19	5.5 x 103	3.8 x 102	9.0 x 102	1.9 x 105	4.8 x 104	1.2 x 105	3.2 x 104	2.4 x 104	1.1 x 104
NSG#15	CB#12	NSG	21	5.7 x 104	1.1 x 104	3.8 x 104	7.1 x 104	1.8 x 104	4.4 x 104	NE	NE	NE
NSG#16	CB#13	NSG	22	1.5 x 104	5.4 x 103	7.0 x 103	3.1 x 104	1.2 x 104	1.1 x 104	3.6 x 103	5.3 x 103	2.6 x 103
NSG#17	CB#13	NSG	23	1.4 x 105	5.3 x 103	9.9 x 104	7.1 x 104	3.4 x 104	3.4 x 104	NE	NE	NE
NSG#18	CB#14	NSG	21	5.8 x 103	1.1 x 103	3.6 x 103	7.8 x 104	8.9 x 103	6.6 x 104	NE	NE	NE
NSG#19	CB#18	NSG	17	3.3 x 104	NE	NE	8.7 x 104	NE	NE	NE	NE	NE
NSG#20	CB#18	NSG	19	1.3 x 104	2.6 x 103	8.4 x 103	7.5 x 104	5.6 x 103	5.9 x 104	3.1 x 103	9.2 x 103	1.5 x 103
NSG#21	CB#19	NSG	20	3.9 x 104	2.3 x 104	1.2 x 104	8.2 x 104	2.2 x 104	4.6 x 104	1.8 x 104	1.6 x 104	1.1 x 104
NSG#22	CB#18	NSG	19	2.5 x 105	1.5 x 105	9.2 x 104	5.9 x 105	8.1 x 104	3.2 x 105	NE	NE	NE
NSG#23	CB#18	NSG	19	2.4 x 104	6.5 x 103	1.5 x 104	2.4 x 105	8.9 x 104	1.4 x 105	NE	NE	NE
NSG#24	CB#19	NSG	17	8.0 x 103	3.2 x 103	3.9 x 103	5.0 x 105	2.4 x 105	2.2 x 105	NE	NE	NE
Mean±SEM	hIL-7xhIL-15 KI			1.8 x 105	8.1 x 104	8.1 x 104	8.5 x 105	6.3 x 105	1.7 x 105	3.7 x 105	4.4 x 105	3.0 x 105
				±2.4 x 104	±1.2 x 104	±1.4 x 104	±1.2 x 105	±8.5 x 104	±2.9 x 104	±1.1 x 105	±7.8 x 104	±7.5 x 104
	NSG			5.0 x 104	2.0 x 104	2.4 x 104	1.9 x 105	6.5 x 104	1.1 x 105	4.6 x 104	5.6 x 104	3.3 x 104
				±1.2 x 104	±7.2 x 103	±7.0 x 103	±3.9 x 104	±1.6 x 104	±2.4 x 104	±2.6 x 104	±3.0 x 104	±2.2 x 104
Table S3. Total cell number of engraftment of human NK cell subset in NSG mice expressing hIL-7 and hIL-15
aNumber of weeks after CB transplantation when euthanized are shown.
bExpression of cytotoxic granules in cytoplasmic of splenic cells are shown.
NE, not examined
