# Supplementary material for: Human NK cell development in hIL-7 and hIL-15 knockin NOD/SCID/IL2rgKO mice
Source: Life Sci Alliance. 2019 Apr 1;2(2):e201800195. doi: 10.26508/lsa.201800195 (PMC6445396; doi:10.26508/lsa.201800195)
Supplement: Supplementary file 4 [file LSA-2018-00195_TableS4.xlsx]

## Sheet: Sheet1
Strain	Number of recipient mice	BM			Spleen			PB
		T cells	B cells	NK cells	T cells	B cells	NK cells	T cells	B cells	NK cells
hIL-15 KI	6	30.5±12.1%	30.6±9.5%	3.8±2.2%	52.8±8.7%	30.9±7.4%	8.0±2.9%	64.2±8.4%	8.9±3.1%	17.8±5.0%
Table S4. Summary of engrafted each lineage within CD45+cells in NSG mice expressing hIL-15.
